# Supplementary material
Source: MDPI journal article supplement (https://www.mdpi.com/2813-0391/1/3/41)
Supplement: s1 [file s1]

Archive with 1 entries (1 files):
- waste-2525673-supplementary.pdf
