# Supplementary material
Source: MDPI journal article supplement (https://www.mdpi.com/2813-0391/1/3/41)
Supplement: s1 [file s1 › waste-2525673-supplementary.pdf]

# Supplementary Materials

## Potential for thermo-chemical conversion of solid waste in Canada to fuel, heat and electricity

Yuxiang Yao<sup>1</sup>, Chandhini Ramu<sup>1</sup>, Allison Procher<sup>2</sup>, Jennifer Littlejohns<sup>2</sup>, Josephine M Hill<sup>1</sup>, and James Butler<sup>2,\*</sup>

<sup>1</sup> Department of Chemical and Petroleum Engineering, University of Calgary, 2500 University Dr. NW, Calgary, AB, T2N 4E4, Canada

<sup>2</sup> Energy, Mining and Environment, National Research Council of Canada, 1200 Montreal Rd. Ottawa, ON, Canada

\*Corresponding author, james.butler@nrc-cnrc.gc.ca

### List of Contents

1. **Table S1.** Solid waste definitions.
2. **Table S2.** Major metal species that exceed 1000 ppm on a dry basis, sulfur, and chlorine content in wt% on a dry and ash free basis for the solid waste studied [1].
3. **Table S3.** Entry names and codes used from ECN Phyllis database for data generated in Table 3 [1].
4. **Sample Calculation of Energy Potential for Heat Generation**

Table S1. Solid waste definitions.

| Waste Type              | Definition and Reference                                                                                                                                                                                                                                                                                                                                                                                                                                              |
|-------------------------|-----------------------------------------------------------------------------------------------------------------------------------------------------------------------------------------------------------------------------------------------------------------------------------------------------------------------------------------------------------------------------------------------------------------------------------------------------------------------|
| <b>Biogenic organic</b> | "Materials that are or were once living, such as leaves, grass, yard trimmings, agricultural crop residues, wood waste, and paper and paperboard products or food scraps [2]."                                                                                                                                                                                                                                                                                        |
| Food                    | "Includes food wastes and food scraps from households and non-residential sources such as grocery stores, restaurants, etc., destined for composting or anaerobic digestion [2]." "Discarded animal and vegetable matter from food and food preparation; sources include residences and commercial establishments, such as grocery stores, restaurants, produce stands, institutional cafeterias and kitchens, and industrial sources, like employee lunchrooms [3]." |
| Paper                   | "Post-consumer wastepaper is material discarded after consumer use, such as Old Corrugated Containers (OCC), boxboard (used in shoe boxes, cereal boxes, etc.), magazines, and newspapers [4]."                                                                                                                                                                                                                                                                       |
| Wood                    | "The primary constituents of wood waste are used lumber, trim, trees, branches, and other wood debris from construction and demolition clearing and grubbing activities. It includes dimensional lumber, plywood, particle board and fibre board, crating, wood fencing, pressure treated lumber, wood shingles, wooden doors, creosoted wood products, demolition wood waste, painted wood [2]."                                                                     |
| Yard & garden           | "Vegetable matter resulting from gardening, horticulture, agriculture, landscaping, or land clearing operations, including materials such as tree and                                                                                                                                                                                                                                                                                                                 |

|                              |                                                                                                                                                                                                                                                                                                                                                                                                                                                                                                                                                                                     |
|------------------------------|-------------------------------------------------------------------------------------------------------------------------------------------------------------------------------------------------------------------------------------------------------------------------------------------------------------------------------------------------------------------------------------------------------------------------------------------------------------------------------------------------------------------------------------------------------------------------------------|
|                              | shrub trimmings, plant remains, grass clippings, leaves, trees, and stumps [3].”                                                                                                                                                                                                                                                                                                                                                                                                                                                                                                    |
| Pet                          | Feces produced by dog, cat, or other pet animals [5].                                                                                                                                                                                                                                                                                                                                                                                                                                                                                                                               |
| Rubber and leather           | Natural or synthetic rubber or leather products [6].                                                                                                                                                                                                                                                                                                                                                                                                                                                                                                                                |
| Other                        | Include other organics that do not fit into the secondary organic waste types. Waste such as soiled paper, including tissues, paper towel, and food packaging [7].                                                                                                                                                                                                                                                                                                                                                                                                                  |
| <b>Non-biogenic organics</b> | Materials that are made from fossil fuel sources such as natural gas, petroleum, or coal.                                                                                                                                                                                                                                                                                                                                                                                                                                                                                           |
| Plastics                     | End-of-life plastic from type 1 to type 7 [2]. Including recyclable plastics, refundable plastic beverage containers, plastics drink cups, drink cup lids, straws, stirrers, recyclable plastic film, recyclable single use grocery bags, expanded polystyrene, non-recyclable plastics [6].                                                                                                                                                                                                                                                                                        |
| <b>Inorganics</b>            | Materials made from non-carbon elements [8].                                                                                                                                                                                                                                                                                                                                                                                                                                                                                                                                        |
| Metals                       | Includes non-refundable recyclable metal, refundable metal beverage containers, recyclable miscellaneous metal, metals from disassembled household appliances, non-recyclable metals [6].                                                                                                                                                                                                                                                                                                                                                                                           |
| Glass                        | Includes non-refundable recyclable glass, refundable glass beverage containers, non-recyclable miscellaneous glass [6].                                                                                                                                                                                                                                                                                                                                                                                                                                                             |
| <b>Combination</b>           | Waste material contains two or more primary waste types but is counted separately. Even if a specific material from a secondary waste type in this category belongs to another primary waste type, due to the wide crossover variation in primary waste materials, is categorized under combination. For example, textiles can be made of organic cotton (organics) or full synthetic nylon (plastics), but when textiles get disposed of, it is a cluster of all types of textiles exists on the market, so textiles are categorized as one type under the combination waste type. |
| Non-wood construction        | “It generally includes materials such as brick, drywall, metal, cardboard, doors, windows, wiring, etc. It excludes materials from land clearing on areas not previously developed. Non-wood construction waste can come from residential sources such as house renovations or from non-residential sources for example the construction or demolition of office buildings [2].”                                                                                                                                                                                                    |
| Diaper                       | Used diaper containing human urine and feces.                                                                                                                                                                                                                                                                                                                                                                                                                                                                                                                                       |
| Tires                        | Recyclable tires include rubber tires from automobile, trucks, and bicycles [6].                                                                                                                                                                                                                                                                                                                                                                                                                                                                                                    |
| Household appliances         | “Includes metal items such as: stoves, fridges, freezers, air conditioners, dehumidifiers, washers, dryers, hot water tanks, metal sinks, microwaves, and various other metal items [2].”                                                                                                                                                                                                                                                                                                                                                                                           |
| Textiles                     | Natural or synthetic fibre clothing and linens [6].                                                                                                                                                                                                                                                                                                                                                                                                                                                                                                                                 |

|                     |                                                                                                                                                                                                                                                                                                                                                                                                                                                                                                                                                                                                                                                                                                                                                                                                                                                                                                                                            |
|---------------------|--------------------------------------------------------------------------------------------------------------------------------------------------------------------------------------------------------------------------------------------------------------------------------------------------------------------------------------------------------------------------------------------------------------------------------------------------------------------------------------------------------------------------------------------------------------------------------------------------------------------------------------------------------------------------------------------------------------------------------------------------------------------------------------------------------------------------------------------------------------------------------------------------------------------------------------------|
| Electronics         | <p>“Electronics are items that function through the use of electricity and/or batteries. Also included are items that have a circuit board but do not necessarily require electricity from an outlet (such as telecommunication equipment). Examples are personal computers, laptops, monitors, peripheral devices (printers, scanners, etc.), telephones, cell phones, facsimile machines, stereos, portable music players and children’s toys containing electronic components [2].”</p>                                                                                                                                                                                                                                                                                                                                                                                                                                                 |
| Unclassified        | <p>“Inerts and other material not included in any other type. This type may include items from different types combined, which would be very hard to separate. Also includes ceramics, porcelain toilets and sinks, clay roofing tiles and pottery. Articles made from clay and hardened by heat [6].”</p>                                                                                                                                                                                                                                                                                                                                                                                                                                                                                                                                                                                                                                 |
| Other               | <p>May include furniture, mattresses, box springs, gloves, masks, used carpet and underlays [6,9-12].</p>                                                                                                                                                                                                                                                                                                                                                                                                                                                                                                                                                                                                                                                                                                                                                                                                                                  |
| <b>Hazardous</b>    | <p>Hazardous waste is defined as materials that are corrosive, flammable, infectious, reactive, and toxic, and that are harmful or have the potential to be harmful to humans and the environment. Special handling, storing, transportation, treatment, and disposal are required for hazardous waste according to the Transportation of Dangerous Goods Regulations (TDGR), the Canadian Environmental Protection Act (CEPA), the Basel Convention, and the Export and Import of Hazardous Waste Regulations.</p>                                                                                                                                                                                                                                                                                                                                                                                                                        |
| Railway ties*       | <p>Creosote-impregnated wood containing toxic polycyclic aromatic hydrocarbons used for railway construction [13]. “This substance has been added to the List of Toxic Substances. It is entering or may enter the environment in a quantity or concentration or under conditions that: have or may have an immediate or long-term harmful effect on the environment or its biological diversity [14].”</p>                                                                                                                                                                                                                                                                                                                                                                                                                                                                                                                                |
| Biosolids**         | <p>“Organic product obtained from the physico-chemical and/or biological treatment of wastewater. Biosolids result from primary wastewater treatment (primary biosolids), or from secondary wastewater treatment (secondary biosolids), and these two types of biosolids are often combined (mixed biosolids). These biosolids can be derived from the treatment of either municipal wastewater or industrial wastewater [15].” “Insoluble material removed from wastewater treatment processes are referred to as ‘biosolids’. Biosolids can contain organic materials, nutrients, pathogens, metals, and organic chemicals. Some of these are NPRI substances. For NPRI purposes, biosolids (and the NPRI substances in the biosolids) are considered waste and are not an intentionally produced product. Wastewater treatment facilities must report the releases, disposals, and transfers of NPRI substances in biosolids [16].”</p> |
| Household Hazardous | <p>Hazardous waste generated from residential source, consisted of batteries (0.1 million tonnes), paint and solvent (0.07 million tonnes), medication (0.07 million tonnes), used engine oil and anti-freeze (0.03 million tonnes), medical sharps (0.02 million tonnes), and pesticides (3.5 thousand tonnes) [7,17]</p>                                                                                                                                                                                                                                                                                                                                                                                                                                                                                                                                                                                                                 |

**Table S2.** Major metal species that exceed 1000 ppm on a dry basis, sulfur, and chlorine content in wt% on a dry and ash free basis for the solid waste studied [1].

| Waste Type                  | Metal Contaminants (ppm), Sulfur (wt%), and Chlorine Content (wt%) |           |           |           |      |      |           |      |           |      |          |          |          |
|-----------------------------|--------------------------------------------------------------------|-----------|-----------|-----------|------|------|-----------|------|-----------|------|----------|----------|----------|
|                             | Al                                                                 | Ca        | Fe        | K         | Mg   | Na   | P         | Pb   | Si        | Sb   | Zn       | S        | Cl       |
| <b>Biogenic Organic</b>     |                                                                    |           |           |           |      |      |           |      |           |      |          |          |          |
| Food                        |                                                                    | 2100<br>0 |           | 1200<br>0 | 1600 |      | 1100      |      | 4400      |      |          | 0.1<br>6 | 0.2<br>2 |
| Paper                       | 7800                                                               | 9300      | 1700      |           |      |      |           |      | 1900      |      |          | 0.0<br>9 | 0.9<br>6 |
| Wood                        | 3200                                                               | 6900      | 1400      | 4700      |      | 2100 |           |      | 2500<br>0 |      |          | 0.1<br>8 | 0.1<br>7 |
| Yard and garden             | 5400                                                               | 2200<br>0 | 3500      | 4600      | 1800 |      | 1200      |      | 7100<br>0 |      |          | 0.1<br>8 | 0.0<br>2 |
| Rubber and leather          |                                                                    |           |           |           |      |      |           |      |           |      |          | 1.9      | 0.7<br>1 |
| <b>Non-biogenic Organic</b> |                                                                    |           |           |           |      |      |           |      |           |      |          |          |          |
| Plastic                     |                                                                    | 5600      |           |           |      |      |           | 1600 |           | 4700 |          | 0.0<br>9 | 3.6      |
| <b>Combination</b>          |                                                                    |           |           |           |      |      |           |      |           |      |          |          |          |
| Tire                        |                                                                    |           |           |           |      |      |           |      |           |      |          | 1.6      |          |
| <b>Hazardous</b>            |                                                                    |           |           |           |      |      |           |      |           |      |          |          |          |
| Railway ties                |                                                                    | 2200      | 2200      |           |      |      |           |      | 2200      |      |          | 0.0<br>9 | 0.0<br>3 |
| Biosolids                   | 1300<br>0                                                          | 2500<br>0 | 1800<br>0 | 1000<br>0 | 5400 | 7700 | 3800<br>0 |      | 2400<br>0 |      | 130<br>0 | 2        | 0.5<br>6 |

**Table S3.** Entry names and codes used from ECN Phyllis database for data generated in Table 3 [1].

| Waste Type               | Sample Size                                                                                  | ECN Entry Name                                  | ECN Entry Code |
|--------------------------|----------------------------------------------------------------------------------------------|-------------------------------------------------|----------------|
| <b>Biogenic Organics</b> |                                                                                              |                                                 |                |
| Food                     | 42 for C, H, O;<br>43 for N; 36 for<br>S; 25 for Cl; 42<br>for ash; 42 for<br>HHV; 38 for MC | Brewery spent grains                            | #3578          |
|                          |                                                                                              | brewing rests                                   | #1076          |
|                          |                                                                                              | Citrus peels                                    | #3631          |
|                          |                                                                                              | Citrus peels                                    | #3646          |
|                          |                                                                                              | Citrus peels                                    | #3653          |
|                          |                                                                                              | coffee grounds                                  | #1769          |
|                          |                                                                                              | Coffee grounds                                  | #3592          |
|                          |                                                                                              | coffee husk                                     | #2882          |
|                          |                                                                                              | domestic food waste, specified                  | #1589          |
|                          |                                                                                              | domestic food waste, specified                  | #1590          |
|                          |                                                                                              | domestic food waste, unspecified                | #1587          |
|                          |                                                                                              | domestic food waste, unspecified                | #1588          |
|                          |                                                                                              | Empty fruit bunch                               | #3580          |
|                          |                                                                                              | Empty fruit bunch                               | #3581          |
|                          |                                                                                              | Empty fruit bunch                               | #3582          |
|                          |                                                                                              | Empty fruit bunch                               | #3583          |
|                          |                                                                                              | Empty fruit bunch                               | #3584          |
|                          |                                                                                              | Empty Fruit Bunches palm oil                    | #2932          |
|                          |                                                                                              | flour byproducts                                | #1077          |
|                          |                                                                                              | grain screenings                                | #2805          |
|                          |                                                                                              | grain slop                                      | #1075          |
|                          |                                                                                              | grape pomace                                    | #1485          |
|                          |                                                                                              | Grape pomace (left over after juice extraction) | #1252          |
|                          |                                                                                              | grape skins and seeds, air dried                | #2862          |
|                          |                                                                                              | grape skins, air dried                          | #2861          |
|                          |                                                                                              | grapefruit skin                                 | #2286          |
|                          |                                                                                              | Litchi peel                                     | #2923          |
|                          |                                                                                              | Litchi seeds                                    | #2926          |
|                          |                                                                                              | Longan peel                                     | #2924          |
|                          |                                                                                              | Longan seeds                                    | #2927          |
|                          |                                                                                              | Mango peel                                      | #2922          |
|                          |                                                                                              | Mango seeds                                     | #2925          |
|                          |                                                                                              | molasse                                         | #2626          |
|                          |                                                                                              | oil palm empty fruit bunch, pith                | #2897          |
|                          |                                                                                              | Olive pomace                                    | #3586          |
|                          |                                                                                              | Olive Pomace (Valesa)                           | #3654          |
|                          |                                                                                              | olive pomace pellets                            | #2893          |

|       |                                                                                      |                                                  |       |
|-------|--------------------------------------------------------------------------------------|--------------------------------------------------|-------|
|       |                                                                                      | Onion peel                                       | #3068 |
|       |                                                                                      | orange husk                                      | #2169 |
|       |                                                                                      | orange peel and seeds                            | #2832 |
|       |                                                                                      | orange skin, air dried                           | #2880 |
|       |                                                                                      | palm oil kernel shell                            | #2940 |
|       |                                                                                      | palm oil mesocarp fiber                          | #2936 |
|       |                                                                                      | Palm olein                                       | #3627 |
|       |                                                                                      | pineapple bran                                   | #2379 |
|       |                                                                                      | pineapple waste                                  | #1336 |
|       |                                                                                      | potato                                           | #1570 |
|       |                                                                                      | potato fibres                                    | #1065 |
|       |                                                                                      | potato rests                                     | #1068 |
|       |                                                                                      | potato shreds, sorting waste                     | #1066 |
|       |                                                                                      | potato sorting waste                             | #1067 |
|       |                                                                                      | prerefining sediment (vegetable oil)             | #2153 |
|       |                                                                                      | remainder of baking product                      | #1063 |
|       |                                                                                      | soybean oil cake                                 | #2848 |
|       |                                                                                      | spent coffee                                     | #1788 |
|       |                                                                                      | spent coffee                                     | #2190 |
|       |                                                                                      | sugarcane fiber                                  | #2807 |
|       |                                                                                      | tea waste                                        | #980  |
|       |                                                                                      | tea, leaves                                      | #1612 |
|       |                                                                                      | tea, leaves                                      | #1613 |
|       |                                                                                      | tomato pomace (left over after juice extraction) | #1434 |
|       |                                                                                      | waste fat sediment, heavy phase                  | #2151 |
|       |                                                                                      | waste fat sediment, light phase                  | #2150 |
|       |                                                                                      | wheat dust                                       | #1437 |
| Paper | 5 for C, H, O, N;<br>4 for Sulfur; 3<br>for Cl; 6 for ash;<br>4 for HHV; 4 for<br>MC | paper mill waste                                 | #2037 |
|       |                                                                                      | paper waste "Rofire"                             | #2734 |
|       |                                                                                      | paper, 20% kraft waste and 80% OCC               | #2494 |
|       |                                                                                      | paper, mixed waste                               | #2489 |
|       |                                                                                      | paper, mixed waste                               | #2491 |
|       |                                                                                      | paper, mixed waste                               | #2493 |
|       |                                                                                      | paper, newsprint pre-consumer waste              | #2501 |
|       |                                                                                      | rejects from waste paper preparation             | #412  |
|       |                                                                                      | waste paper                                      | #709  |
|       |                                                                                      | waste paper                                      | #1410 |
| Wood  | 31 for C, H, O;<br>33 for N; 35 for<br>S; 36 for Cl; 31                              | holocellulose from waste wood from mulberry      | #950  |
|       |                                                                                      | lignin from waste wood from mulberry             | #949  |
|       |                                                                                      | redwood, mill wastes                             | #1417 |
|       |                                                                                      | sweep waste containing wood, paint, sand         | #677  |

|                                   |                                                                            |       |
|-----------------------------------|----------------------------------------------------------------------------|-------|
| for ash; 24 for<br>HHV; 18 for MC | urban waste wood                                                           | #1989 |
|                                   | urban waste wood                                                           | #2031 |
|                                   | waste wood                                                                 | #2748 |
|                                   | Waste wood (BM3)                                                           | #3060 |
|                                   | waste wood from mulberry                                                   | #951  |
|                                   | wood waste                                                                 | #710  |
|                                   | wood waste                                                                 | #711  |
|                                   | wood waste                                                                 | #1059 |
|                                   | wood waste, dust                                                           | #655  |
|                                   | wood, excess fraction wood from organic domestic<br>waste composting plant | #1089 |
|                                   | wood, excess fraction wood from organic domestic<br>waste composting plant | #1295 |
|                                   | wood, fir mill waste                                                       | #804  |
|                                   | wood, furniture waste                                                      | #397  |
|                                   | wood, furniture waste                                                      | #805  |
|                                   | wood, industrial wood waste, dust                                          | #657  |
|                                   | wood, Jack pine waste (USA)                                                | #880  |
|                                   | wood, lacquered waste wood                                                 | #400  |
|                                   | wood, mixed waste wood                                                     | #276  |
|                                   | wood, park waste wood                                                      | #912  |
|                                   | wood, park waste wood bio-dry                                              | #1088 |
|                                   | wood, uncontaminated waste wood                                            | #309  |
|                                   | wood, waste wood                                                           | #310  |
|                                   | wood, waste wood                                                           | #311  |
|                                   | wood, waste wood                                                           | #312  |
|                                   | wood, waste wood                                                           | #313  |
|                                   | wood, waste wood                                                           | #314  |
|                                   | wood, waste wood                                                           | #315  |
|                                   | wood, waste wood                                                           | #316  |
|                                   | wood, waste wood                                                           | #317  |
|                                   | wood, waste wood                                                           | #318  |
|                                   | wood, waste wood                                                           | #319  |
|                                   | wood, waste wood                                                           | #320  |
|                                   | wood, waste wood                                                           | #321  |
|                                   | wood, waste wood                                                           | #322  |
|                                   | wood, waste wood                                                           | #323  |
|                                   | wood, waste wood                                                           | #324  |
|                                   | wood, waste wood                                                           | #325  |
|                                   | wood, waste wood                                                           | #326  |
|                                   | wood, waste wood                                                           | #327  |
|                                   | wood, waste wood                                                           | #328  |

|                           |                                                               |                                          |       |
|---------------------------|---------------------------------------------------------------|------------------------------------------|-------|
|                           |                                                               | wood, waste wood                         | #329  |
|                           |                                                               | wood, waste wood                         | #330  |
|                           |                                                               | wood, waste wood                         | #331  |
|                           |                                                               | wood, waste wood                         | #332  |
|                           |                                                               | wood, waste wood                         | #333  |
|                           |                                                               | wood, waste wood                         | #334  |
|                           |                                                               | wood, waste wood                         | #335  |
|                           |                                                               | wood, waste wood                         | #336  |
|                           |                                                               | wood, waste wood                         | #337  |
|                           |                                                               | wood, waste wood                         | #338  |
|                           |                                                               | wood, waste wood                         | #339  |
|                           |                                                               | wood, waste wood                         | #340  |
|                           |                                                               | wood, waste wood                         | #341  |
|                           |                                                               | wood, waste wood                         | #342  |
|                           |                                                               | wood, waste wood                         | #926  |
|                           |                                                               | wood, waste wood                         | #2809 |
| Yard                      | 3 for C, H, O, N, S; 3 for Cl; 1 for ash; 2 for HHV; 3 for MC | mowing waste                             | #1058 |
|                           |                                                               | Urban leaf litter                        | #3590 |
|                           |                                                               | Urban leaf litter                        | #3591 |
|                           |                                                               | Withered leaves                          | #3065 |
| Rubber and leather        | 2 for C, H, O, N, S; 2 for Cl; 2 for ash; 1 for HHV; 2 for MC | leather waste                            | #2930 |
|                           |                                                               | waste rubber chips                       | #1775 |
| Other bio-genic organ-ics | 47 for ash; 28 for HHV; 40 for MC                             | Greenhouse waste (sweet pepper residues) | #3537 |
|                           |                                                               | agrarian residues                        | #1069 |
|                           |                                                               | beet tail and beet green                 | #1053 |
|                           |                                                               | cane tops                                | #1792 |
|                           |                                                               | cane trash                               | #1906 |
|                           |                                                               | cassava residues                         | #2596 |
|                           |                                                               | cellulose                                | #389  |
|                           |                                                               | cellulose                                | #1720 |
|                           |                                                               | cellulose                                | #1734 |
|                           |                                                               | cellulose                                | #2741 |
|                           |                                                               | cellulose, dissolving                    | #2525 |
|                           |                                                               | compost                                  | #391  |
|                           |                                                               | Compost                                  | #3488 |
|                           |                                                               | Compost                                  | #3489 |
|                           |                                                               | Compost                                  | #3490 |
|                           |                                                               | digestate                                | #2646 |
|                           |                                                               | Digestate                                | #3593 |
|                           |                                                               | digestate from organic waste             | #2907 |

|                                                  |       |
|--------------------------------------------------|-------|
| domestic food waste, specified                   | #1589 |
| domestic food waste, specified                   | #1590 |
| domestic food waste, unspecified                 | #1587 |
| domestic food waste, unspecified                 | #1588 |
| domestic organic waste from municipal collection | #393  |
| domestic vegetable + fruit waste                 | #1591 |
| Dutch organic domestic waste (GFT)               | #1716 |
| Eggplant residues 650°C                          | #3641 |
| flesh residues (tannery waste)                   | #2300 |
| fresh Dutch domestic organic waste               | #1765 |
| garlic waste                                     | #2070 |
| greenhouse residues                              | #1055 |
| hair residues (tannery waste)                    | #2298 |
| hemicellulose                                    | #1736 |
| holocellulose from waste wood from mulberry      | #950  |
| humus from digested MSW                          | #2132 |
| humus from digested MSW                          | #2133 |
| kale, stalk                                      | #1559 |
| Kraft lignin from Eucalyptus                     | #944  |
| leather waste                                    | #2930 |
| leather waste, gasifier cyclone ash              | #2931 |
| leather, dark brown                              | #2755 |
| lignin (Indulin ATR-CK1)                         | #1694 |
| lignin from poplar                               | #1999 |
| lignin from softwood                             | #2000 |
| lignin from waste wood from mulberry             | #949  |
| lignin kraft                                     | #2457 |
| lignin soda                                      | #2458 |
| MSW compost                                      | #1527 |
| MSW compost                                      | #3345 |
| MSW organic wet fraction                         | #3199 |
| Mushroom manure                                  | #3066 |
| organic domestic waste (ODW)                     | #1300 |
| organic domestic waste, the Netherlands          | #1341 |
| organic domestic waste, the Netherlands          | #1342 |
| organic domestic waste, the Netherlands          | #1343 |
| organic domestic waste, the Netherlands          | #1344 |
| organic domestic waste, the Netherlands          | #1345 |
| organic domestic waste, the Netherlands (GFT)    | #1060 |
| Organic fertilizer                               | #3495 |
| Organic wet fraction municipal waste             | #3198 |

|                       |                                                                                 |                                                                                     |       |
|-----------------------|---------------------------------------------------------------------------------|-------------------------------------------------------------------------------------|-------|
|                       |                                                                                 | organosolv lignin (ALCELL)                                                          | #1735 |
|                       |                                                                                 | palm fibre                                                                          | #2237 |
|                       |                                                                                 | palm fibres                                                                         | #1914 |
|                       |                                                                                 | paper waste "Rofire"                                                                | #2734 |
|                       |                                                                                 | pepper waste                                                                        | #1915 |
|                       |                                                                                 | rape seed extraction material                                                       | #1442 |
|                       |                                                                                 | skin residues (tannery waste)                                                       | #2299 |
|                       |                                                                                 | stubble turnip                                                                      | #2262 |
|                       |                                                                                 | sugarbeet, leaves and tops                                                          | #2622 |
|                       |                                                                                 | sugarbeet, leaves and tops, 90 days ensilaged                                       | #2623 |
|                       |                                                                                 | sweet patato vines                                                                  | #2590 |
|                       |                                                                                 | sweet pepper, greenhouse waste                                                      | #2539 |
|                       |                                                                                 | tofu residues                                                                       | #2591 |
|                       |                                                                                 | tomato plant waste                                                                  | #2261 |
|                       |                                                                                 | tomato plant, greenhouse waste                                                      | #2538 |
|                       |                                                                                 | tomato plant, greenhouse waste                                                      | #3517 |
|                       |                                                                                 | waste from brewing-industries                                                       | #422  |
|                       |                                                                                 | waste from malt-industries                                                          | #423  |
| Non-biogenic Organics |                                                                                 |                                                                                     |       |
| Plastics              | 3 for C, H; 2 for O; 3 for N; 3 for S; 3 for Cl; 3 for ash; 3 for HHV; 1 for MC | plastic fraction (the Netherlands)                                                  | #1877 |
|                       |                                                                                 | plastics from waste from electrical and electronic equipment (WEEE) material, mix 1 | #2178 |
|                       |                                                                                 | plastics from waste from electrical and electronic equipment (WEEE) material, mix 2 | #2179 |
| Combination           |                                                                                 |                                                                                     |       |
| Tires                 | 3 for C, H, O, N, S; 0 for Cl; 3 for ash; 3 for HHV; 3 for MC                   | rubber tyre waste                                                                   | #918  |
|                       |                                                                                 | waste tyres                                                                         | #1495 |
|                       |                                                                                 | waste tyres                                                                         | #1687 |
| Hazardous             |                                                                                 |                                                                                     |       |
| Railway ties          | 5 for C, H, O, N; 7 for S; 5 for Cl; 5 for ash; 5 for HHV; 3 for MC             | railroad ties, sleepers                                                             | #406  |
|                       |                                                                                 | railroad ties, sleepers                                                             | #407  |
|                       |                                                                                 | railroad ties, sleepers                                                             | #654  |
|                       |                                                                                 | railroad ties, sleepers                                                             | #853  |
|                       |                                                                                 | railroad ties, sleepers                                                             | #854  |
|                       |                                                                                 | railroad ties, sleepers                                                             | #876  |
|                       |                                                                                 | railroad ties, sleepers                                                             | #885  |
| Biosolids             | 10 for C, H, O, N, S; 7 for Cl; 9 for ash; 8 for HHV; 10 for MC                 | sewage sludge (mech. dried)                                                         | #1777 |
|                       |                                                                                 | sewage sludge digestate, dried                                                      | #2913 |
|                       |                                                                                 | sewage sludge, dried                                                                | #960  |
|                       |                                                                                 | sewage sludge, dried                                                                | #961  |
|                       |                                                                                 | sewage sludge, dried                                                                | #2158 |

|                                                                     |       |
|---------------------------------------------------------------------|-------|
| sewage sludge, dried                                                | #2899 |
| sewage sludge, dried                                                | #2919 |
| sewage sludge, dried                                                | #3188 |
| sewage sludge, dried (thermal)                                      | #2191 |
| sewage sludge, dried for cocombustion in PF boiler<br>UNA Amsterdam | #2188 |

#### 4. Sample Calculation of Energy Potential for Heat Generation

The following calculation is done for waste plastic using the quantity generated and fraction disposed from Table 2, average higher heating value from Table 3, and conversion efficiency for incineration from Table 1.

*Energy Potential*

$$\begin{aligned}
 &= \text{Quantity Generated} \times \text{Fraction Disposed} \times \text{Heating Value} \times \text{Conversion Efficiency} \\
 &= 3,625,479,000 \frac{\text{kg}}{\text{yr}} \times 0.89 \times 30,000,000 \frac{\text{J}}{\text{kg}} \times 0.6 = 5.8 \times 10^{16} \text{J} \times \frac{\text{TJ}}{10^{12} \text{J}} = 58,000 \text{ TJ}
 \end{aligned}$$

## References

1. ECN Phyllis classification. Available online: <https://phyllis.nl/Browse/Standard/ECN-Phyllis> (accessed on November 2022).
2. Waste Management Industry Survey: Government Sector. Available online: [https://www23.statcan.gc.ca/imdb/p3Instr.pl?Function=getInstrumentList&Item\\_Id=240306&UL=1V&](https://www23.statcan.gc.ca/imdb/p3Instr.pl?Function=getInstrumentList&Item_Id=240306&UL=1V&) (accessed on November 2022).
3. David, A. *Technical document on municipal solid waste organics processing*; Environment Canada: Gatineau Québec, 2013.
4. *Preliminary Resource Recovery Report Card and Gaps Assessment for Canada*; Natural Resources Canada, 2020.
5. What to Do with Pet Waste. Metrovancouver. Available online: <http://www.metrovancouver.org/services/solid-waste/wte-and-disposal/pet-waste/Pages/default.aspx> (accessed on March 2022).
6. Appendix 1a. Waste Material Types/Names and Definition (Manual Sort). City of Calgary. Available online: <https://www.calgary.ca/categories/subcategory-garbageinfo-grid.html> (accessed on November 2022).
7. *National Waste Characterization Report*; 9780660341569; 2020; pp. 1-73.
8. Inorganic Chemistry. Available online: <https://www.acs.org/careers/chemical-sciences/areas/inorganic-chemistry.html> (accessed on March 2022).
9. Metro Vancouver Full-Scale Waste Composition Study Report. Metrovancouver. Available online: <http://www.metrovancouver.org/services/solid-waste/about/reports-resources/Pages/default.aspx> (accessed on November 2022).
10. 2020 Litter Audit. City of Toronto. Available online: <https://www.toronto.ca/wp-content/uploads/2021/02/8de3-Toronto-Litter-2020Final-Report.pdf> (accessed on November 2022).
11. Solid Waste Composition Study. TRI Environmental Consulting Inc. Available online: [https://www.rdno.ca/sites/default/files/2021-04/2021\\_Waste\\_comp\\_RPT.pdf](https://www.rdno.ca/sites/default/files/2021-04/2021_Waste_comp_RPT.pdf) (accessed on November 2022).
12. Waste Audit Report. Divert NS. Available online: <https://divertns.ca/sites/default/files/researchreportsfiles/2021-09/WasteAudit2017.pdf> (accessed on November 2022).
13. *Creosote-impregnated waste materials*; 0662204778; Environment Canada: Ottawa, 1993.
14. Toxic substances list: creosote-impregnated waste materials from creosote-contaminated sites. Available online: <https://www.canada.ca/en/environment-climate-change/services/management-toxic-substances/list-canadian-environmental-protection-act/creosote-impregnated-waste-materials.html> (accessed on March 2023).
15. *Guidelines for compost quality*; Canadian Council of Ministers of the Environment: Winnipeg, Man, 2013.
16. Biosolids: guide to reporting. Available online: <https://www.canada.ca/en/environment-climate-change/services/national-pollutant-release-inventory/report/sector-specific-tools-calculate-emissions/biosolids-guide.html> (accessed on March 2023).
17. Solid waste diversion and disposal. Available online: <https://www.canada.ca/en/environment-climate-change/services/environmental-indicators/solid-waste-diversion-disposal.html> (accessed on November 2022).
